# Supplementary material
Source: Springer Nature journal article supplement (https://www.springermedizin.de/resource/supplementary/12887_2011_506_MOESM4_ESM.pdf/9475312)

Generalized Lorenz Graphs  
(Cumulative Mean) of Birth Weight (Kg)

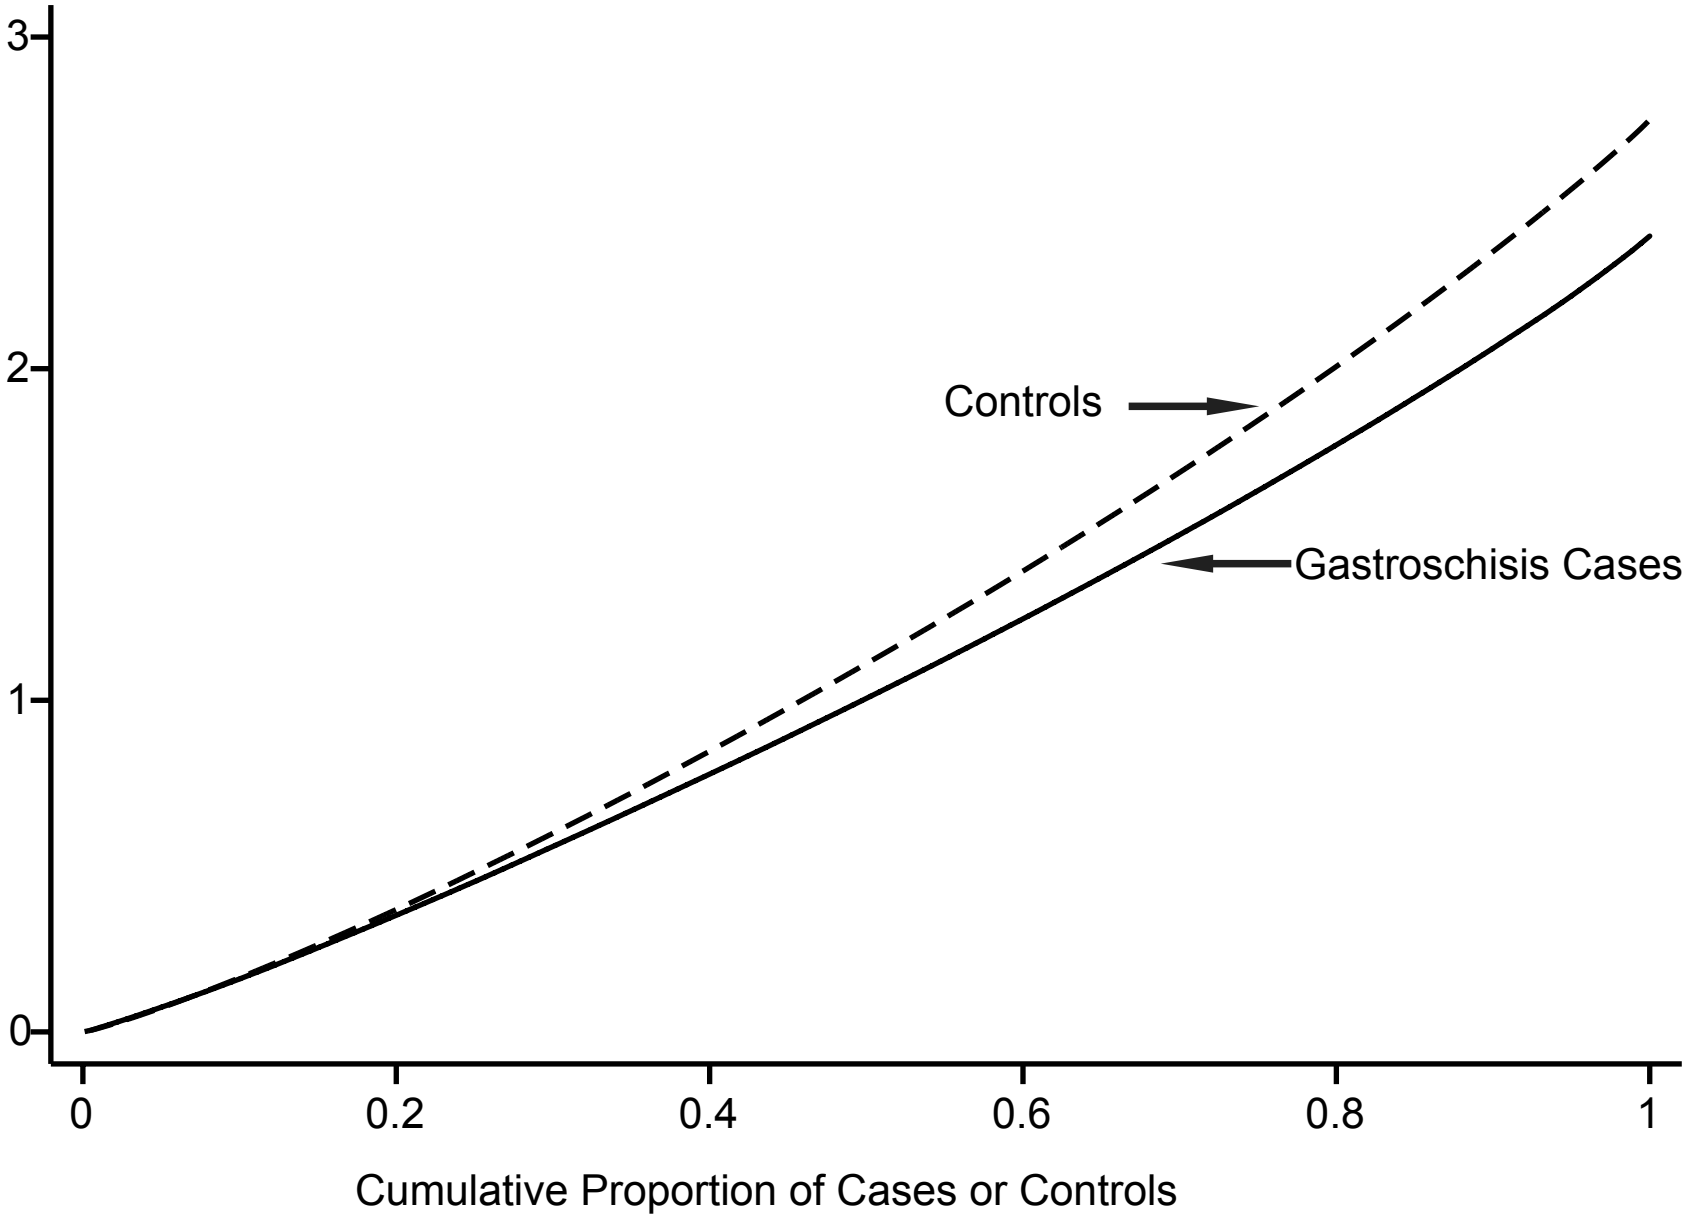

Controls →

← Gastroschisis Cases

Supplement: MOESM4 [file 9475312]
